# Supplementary material for: Switching Dynamics in an Interpersonal Competition Brings about “Deadlock” Synchronization of Players
Source: PubMed Central journal article supplement (PMC3489899; doi:10.1371/journal.pone.0047911), 2012-11-05
Supplement: pone.0047911.s006.pdf [file pone.0047911.s006.pdf]

**Text S1: Comment about zero sum nature of the sport game.**

it is important to note that scoring systems are different between games and may not reflect the absolute value of the game result for each team. For example, a three point win (1 for tie, zero for loss) scoring system would increase the goal of winning but not to tie because the difference between win-tie values (=2) is twice as great than tie-loss difference (=1). Such bias can arbitrarily control game behavior. It can increase a fun for spectator; however, in principle, each value for win and loss must be the same in absolute terms.
