# Supplementary material for: Switching Dynamics in an Interpersonal Competition Brings about “Deadlock” Synchronization of Players
Source: PubMed Central journal article supplement (PMC3489899; doi:10.1371/journal.pone.0047911), 2012-11-05
Supplement: pone.0047911.s009.pdf [file pone.0047911.s009.pdf]

## **Text S4: Effectiveness of Hilbert transform on current $SV(t)$ data.**

Hilbert transform is suit to extract phase information from relatively slowly varying one dimensional time-series signal such as  $SV(t)$  in our data. It is difficult to detect characteristic time events (e.g. a time of peak in a cycle) so that phase information would be difficult to extract from them. Hilbert transform procedure is one of the solutions for this problem in that it transforms a one dimensional scalar signal ( $s(t)$ ) into complex form ( $s(t) + is_H(t)$ ), and calculates the phase for every point of  $s(t)$  as an angle on ( $s(t), s_H(t)$ ) plane. This calculation is effective to calculate phase for all the points within a characteristic period and obtain sufficient statistics for the determination of the phase relationship. We subtracted the mean value from original  $SV(t)$  signal before transformation as the calculated value is sensitive to low-frequency trends [1].

## **References**

1. Pikovski A, Rosenblum M, Kurths J (2001) Synchronization: A universal concept in nonlinear sciences. Cambridge, MA: Cambridge University Press.
